# Supplementary material for: Women in Saudi Arabia and the Prevalence of Cardiovascular Risk Factors: A Systematic Review
Source: Hindawi journal article supplement (doi:10.1155/2016/7479357), 2016-01-01
Supplement: f1 [file 7479357.f1.pdf]

## Supplement report

**Table 2\*\*:** Quality assessment

| Quality Assessments |                                                         |                                    |    |   |   |               |   |                   |   |   |                                 |    |   |                               |    |                         |   |   |               | Total=9 |   |   |
|---------------------|---------------------------------------------------------|------------------------------------|----|---|---|---------------|---|-------------------|---|---|---------------------------------|----|---|-------------------------------|----|-------------------------|---|---|---------------|---------|---|---|
| Num ber             | study                                                   | Selection total = total 4 points   |    |   |   |               |   |                   |   |   |                                 |    |   | Comparability= total 2 points |    | Outcome= total 3 points |   |   |               |         |   |   |
|                     |                                                         | 1.Representativeness of the sample |    |   |   | 2.Sample size |   | 3.Non-respondents |   |   | 4.Ascertainment of the exposure |    |   | 1.Confounding factors         |    | 1.Assessment            |   |   | 2.Statistical |         |   |   |
|                     |                                                         | A*                                 | B* | C | D | A*            | B | A*                | B | C | A*                              | B* | C | A*                            | B* | A*                      | B | C | D             | A*      | B |   |
| 1                   | Mahfouz, Alsanosy, Gaffar, & Makeen, 2014               | *                                  |    |   |   | *             |   |                   |   |   |                                 | *  |   | *                             |    |                         |   | * | *             |         |   | 6 |
| 2                   | Khalaf, Westergren, Berggren, Ekblom, & Al-Hazzaa, 2014 |                                    | *  |   |   | *             |   |                   |   |   |                                 | *  |   | *                             | *  |                         |   | * | *             |         |   | 7 |
| 3                   | Ibrahim et al., 2014                                    |                                    | *  |   |   | *             |   |                   |   |   | *                               |    |   | *                             | *  |                         |   | * | *             |         |   | 7 |
| 4                   | AlSwuailem, AlShehri, & Al-Sadhan, 2014                 |                                    | *  |   |   |               | * |                   |   |   |                                 |    | * | *                             | *  |                         |   | * | *             |         |   | 5 |
| 6                   | Koura, Al-Dabal, Rasheed, Al-Sowielem, & Makki, 2012    |                                    | *  |   |   | *             |   |                   |   | * | *                               |    |   |                               | *  |                         |   | * | *             |         |   | 6 |
| 7                   | Azhar & Alsayed, 2012                                   |                                    | *  |   |   |               | * |                   |   | * | *                               |    |   |                               | *  |                         |   | * |               | *       |   | 3 |
| 8                   | Allam, Taha, Al-Nozha, & Sultan, 2012                   |                                    | *  |   |   |               | * |                   |   | * | *                               |    |   |                               | *  |                         |   | * | *             |         |   | 5 |
| 9                   | Abolfotouh, Al-Alwan, & Al-Rowaily, 2012                |                                    | *  |   |   |               | * |                   |   | * |                                 |    | * | *                             | *  |                         |   |   | *             | *       |   | 3 |
| 10                  | Wali, 2011                                              |                                    | *  |   |   |               | * |                   |   | * | *                               |    |   |                               | *  |                         |   | * | *             |         |   | 5 |
| 12                  | Mandil et al., 2011                                     |                                    | *  |   |   |               | * |                   | * |   | *                               | *  |   |                               | *  |                         |   | * | *             |         |   | 5 |
| 13                  | Al Qauhiz, 2010                                         |                                    | *  |   |   | *             |   |                   |   | * |                                 |    | * | *                             | *  |                         |   | * | *             |         |   | 5 |
| 14                  | Subhan, Al-Khlaiwi, & Ghandourah, 2009                  |                                    | *  |   |   |               | * |                   |   | * |                                 |    | * | *                             | *  |                         |   | * | *             |         |   | 4 |
| 15                  | Y. A. Al-Turki & Al-Rowais, 2008                        |                                    |    | * |   |               | * |                   |   |   |                                 |    | * | *                             | *  |                         |   | * | *             |         | * | 1 |
| 16                  | Merdad, Al-Zahrani, & Farsi, 2007                       |                                    | *  |   |   | *             |   |                   |   | * | *                               |    |   | *                             | *  |                         |   | * | *             |         | * | 5 |
| 17                  | Hasim, 2000                                             |                                    |    | * |   |               | * |                   |   | * |                                 |    | * | *                             | *  |                         |   | * | *             |         |   | 2 |
| 18                  | Amin, Al Sultan, Mostafa, Darwish, & Al-Naboli, 2014    | *                                  |    |   |   |               | * |                   |   |   | *                               | *  |   | *                             | *  |                         |   | * | *             | *       | * | 7 |
| 19                  | Rehmani et al., 2013                                    | *                                  |    |   |   | *             |   |                   |   |   |                                 | *  | * | *                             | *  |                         |   | * | *             | *       | * | 6 |
| 20                  | Siddiqui & Ogbeide, 2001                                |                                    |    |   |   |               |   |                   |   |   |                                 |    |   |                               |    |                         |   |   |               |         |   |   |
| 21                  | Abalkhail, Shawky, Ghabrah, & Milaat, 2000              |                                    | *  |   |   | *             |   |                   |   |   |                                 |    | * | *                             | *  |                         |   | * | *             |         | * | 5 |
| 22                  | AlQuaiz et al., 2015                                    |                                    |    |   | * |               | * |                   |   | * | *                               |    | * | *                             | *  |                         |   | * | *             | *       | * | 5 |
| 23                  | Elkhalifa, Kinsara, & Almadani, 2011                    |                                    |    | * |   |               | * |                   |   | * |                                 |    | * | *                             | *  |                         |   | * | *             | *       | * | 3 |

|    |                                                           |   |   |  |   |   |   |  |   |   |   |   |   |   |   |   |   |   |   |   |
|----|-----------------------------------------------------------|---|---|--|---|---|---|--|---|---|---|---|---|---|---|---|---|---|---|---|
| 24 | Al-Daghri et al., 2013                                    |   | * |  |   | * |   |  | * |   | * |   |   | * |   |   | * | * |   | 4 |
| 25 | Habib, 2013                                               |   |   |  | * | * |   |  | * |   |   | * |   |   |   |   | * |   |   | 1 |
| 26 | Amin, Al-Hammam, et al., 2014                             | * |   |  |   |   |   |  | * |   |   | * | * | * |   | * | * |   | 7 |   |
| 27 | Ahmed, Ginawi, Elsbali, Ashankyty, & Al-Hazimi, 2014      | * |   |  | * |   |   |  | * |   | * |   | * | * | * |   | * |   | 7 |   |
| 28 | Safar A Al-Saleem, 2013                                   |   | * |  | * |   |   |  | * |   | * | * | * | * | * |   | * |   | 5 |   |
| 29 | Al-Zahrani, 2011                                          |   |   |  | * | * |   |  | * |   | * |   | * |   | * | * | * |   | 3 |   |
| 30 | Alqurashi, Aljabri, & Bokhari, 2011                       |   |   |  | * | * |   |  | * |   | * |   | * |   | * | * | * |   | 3 |   |
| 31 | Ogbeide, Karim, Al-Khalifa, & Siddique, 2004              |   |   |  | * | * |   |  | * |   | * |   | * |   | * | * | * |   | 2 |   |
| 32 | Al-Malki, Al-Jaser, & Warsy, 2003                         |   |   |  | * | * |   |  | * |   | * |   | * |   | * |   | * | * | 3 |   |
| 33 | Kalantan, Mohamed, Al-Taweel, & Abdul Ghani, 2001         |   | * |  | * |   |   |  | * |   | * |   | * |   | * | * | * | * | 5 |   |
| 34 | Abolfotouh, Daffallah, Khan, Khattab, & Abdulmoneim, 2001 |   | * |  | * |   |   |  | * |   | * |   | * |   | * | * | * | * | 4 |   |
| 35 | Saima Siddiqui, 2000                                      |   |   |  | * | * |   |  | * |   | * |   | * |   | * |   | * |   | 1 |   |
| 36 | Karim, Ogbeide, Siddiqui, & Al-Khalifa, 2000              |   | * |  | * |   |   |  | * |   | * |   | * |   | * |   | * |   | 2 |   |
| 37 | Al-Humaidi, 2000                                          |   |   |  | * | * |   |  | * | * |   | * |   | * |   | * | * | * | 4 |   |
| 38 | Al-Qahtani, Imtiaz, Saad, & Hussein, 2006                 |   | * |  | * |   |   |  | * | * |   | * |   | * |   | * | * | * | 6 |   |
| 39 | Saeed et al., 2011                                        | * |   |  | * |   |   |  | * | * |   | * | * | * | * | * | * | * | 7 |   |
| 40 | Memish et al., 2014                                       | * |   |  | * | * | * |  | * |   | * | * | * | * | * | * | * | * | 8 |   |
| 41 | El Bcheraoui et al., 2014                                 | * |   |  | * | * | * |  | * |   | * | * | * | * | * | * | * | * | 9 |   |
| 42 | Basulaiman et al., 2014                                   | * |   |  | * | * | * |  | * |   | * | * | * | * | * | * | * | * | 8 |   |
| 43 | Aljohani, 2014                                            | * |   |  | * |   |   |  | * |   | * |   | * | * | * | * | * | * | 8 |   |
| 44 | Al-Daghri et al., 2014                                    | * |   |  | * |   |   |  | * |   | * |   | * | * | * | * | * | * | 7 |   |
| 45 | Al-Baghli et al., 2010                                    |   | * |  | * | * | * |  | * |   | * |   | * | * | * | * | * | * | 7 |   |
| 46 | Al-Daghri et al., 2011                                    |   | * |  | * |   |   |  | * |   | * |   | * | * | * | * | * | * | 6 |   |
| 47 | Albedah, Khalil, Khalil, & Elolemy, 2011                  |   | * |  | * |   |   |  | * |   | * |   | * | * | * | * | * | * | 5 |   |
| 48 | K. A. Al-Turki et al., 2010                               |   | * |  | * |   |   |  | * |   | * |   | * | * | * | * | * | * | 5 |   |
| 49 | Al-Daghri et al., 2010                                    |   | * |  | * |   |   |  | * |   | * |   | * | * | * | * | * | * | 6 |   |
| 50 | Al-Baghli et al., 2009                                    |   | * |  | * |   |   |  | * |   | * |   | * | * | * | * | * | * | 6 |   |

|    |                                                          |   |   |  |   |   |   |   |   |   |   |   |   |   |   |   |   |  |   |
|----|----------------------------------------------------------|---|---|--|---|---|---|---|---|---|---|---|---|---|---|---|---|--|---|
| 51 | K. A. Al-Turki, Al-Baghli, Al-Ghamdi, & El-Zubaier, 2008 |   | * |  |   | * |   |   | * |   | * |   |   | * |   | * | * |  | 6 |
| 52 | Al-Nozha et al., 2008                                    | * |   |  | * |   | * |   |   | * |   | * |   | * |   | * | * |  | 8 |
| 53 | Al-Baghli et al., 2008                                   |   | * |  | * |   |   | * |   | * |   |   | * |   | * |   | * |  | 6 |
| 54 | Al-Othaimen, Al-Nozha, & Osman, 2007                     |   | * |  |   | * |   |   |   | * |   |   | * |   | * |   | * |  | 5 |
| 55 | Al-Nozha, Al-Hazzaa, et al., 2007                        | * |   |  | * |   |   | * |   | * |   |   | * |   | * |   | * |  | 6 |
| 56 | Al-Nozha, Abdullah, et al., 2007                         | * |   |  | * |   |   | * |   | * |   |   | * |   | * |   | * |  | 6 |
| 57 | M. M. Al-Nozha et al., 2005                              | * |   |  | * |   |   | * |   | * |   |   | * |   | * |   | * |  | 6 |
| 58 | M. Al-Nozha et al., 2005                                 | * |   |  | * |   |   | * |   | * |   |   | * |   | * |   | * |  | 6 |
| 59 | Al-Nozha et al., 2004                                    | * |   |  | * |   |   | * |   | * |   |   | * |   | * |   | * |  | 6 |
| 60 | (Soofi & Youssef, 2015)                                  |   | * |  | * |   |   |   |   | * |   | * |   | * |   | * | * |  | 6 |
| 61 | (Moradi-Lakeh et al., 2015)                              | * | * |  | * |   |   |   | * |   |   |   | * |   | * |   | * |  | 7 |
